# Supplementary material
Source: ML conference proceedings conference paper supplement (https://openaccess.thecvf.com/content/cvpr_2016/html/Shin_Automating_Carotid_Intima-Media_2016_CVPR_paper.html)
Supplement: Supplementary file 1 [file Shin_Automating_Carotid_Intima-Media_2016_CVPR_supplemental.pdf]

## Supplementary material

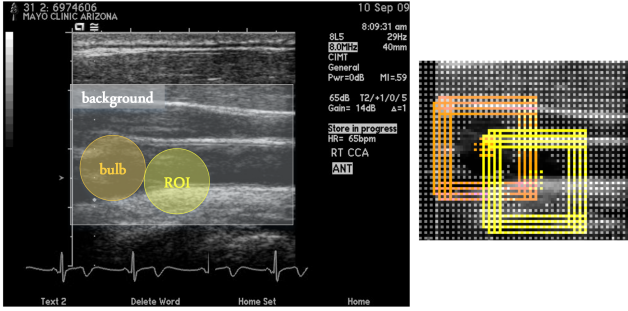

Figure 9: For constrained ROI localization, we use a 3-way CNN whose training image patches are extracted from a grid of points on the background and around the ROI and the carotid bulb locations.

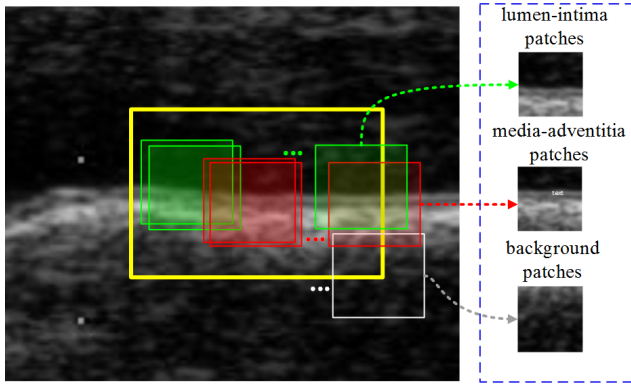

Figure 10: For lumen-intima and media-adventitia interface segmentation, we use a 3-way CNN whose training image patches are extracted from the background and around the lumen-intima and media-adventitia interfaces.
